# Supplementary material
Source: PubMed Central journal article supplement (PMC10840648)
Supplement: NIHMS1923907-supplement-Supplemental_Digital_Content.pdf [file NIHMS1923907-supplement-Supplemental_Digital_Content.pdf]

## Supplemental Digital Content

### Contribution of $\mu$ opioid receptor-expressing dorsal horn interneurons to neuropathic pain

Yanmei Qi<sup>1</sup>, Tyler S. Nelson<sup>1</sup>, Pranav Prasoon<sup>1</sup>, Christopher Norris<sup>1</sup>, and Bradley K. Taylor<sup>1</sup>

1. Department of Anesthesiology and Perioperative Medicine, Center for Neuroscience, Pittsburgh Center for Pain Research, Pittsburgh Project to end Opioid Misuse, University of Pittsburgh School of Medicine, Pittsburgh, PA, USA

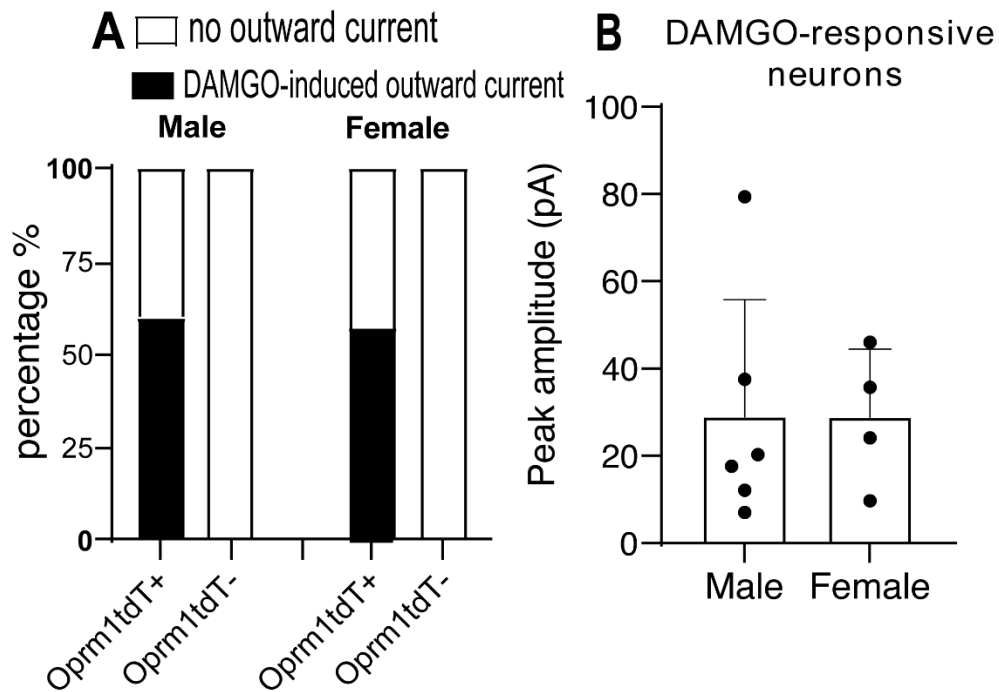

**Supplementary Figure 1. DAMGO induced an outward current in both male and female tdTomato-labelled MOR-INs.** (A) Mean amplitude of DAMGO-induced outward currents in Oprm1<sup>tdT+</sup> neurons in male (n=6 cells from 4 mice) and female (n=4 cells from 3 mice). (B) Proportion of Oprm1<sup>tdT+</sup> neurons that exhibited outward currents to DAMGO (1 $\mu$ M, 2 min) in male (n=10 neurons from 4 mice) and female (n=7 neurons from 3 mice). DAMGO did not evoke responses in Oprm1<sup>tdT-</sup> neurons (n=6 neurons from 2 male mice and n=3 neurons from 1 female mouse). Data are presented as mean  $\pm$  SD. These panels represent the data illustrated in Figures 3C-D, segregated by sex.

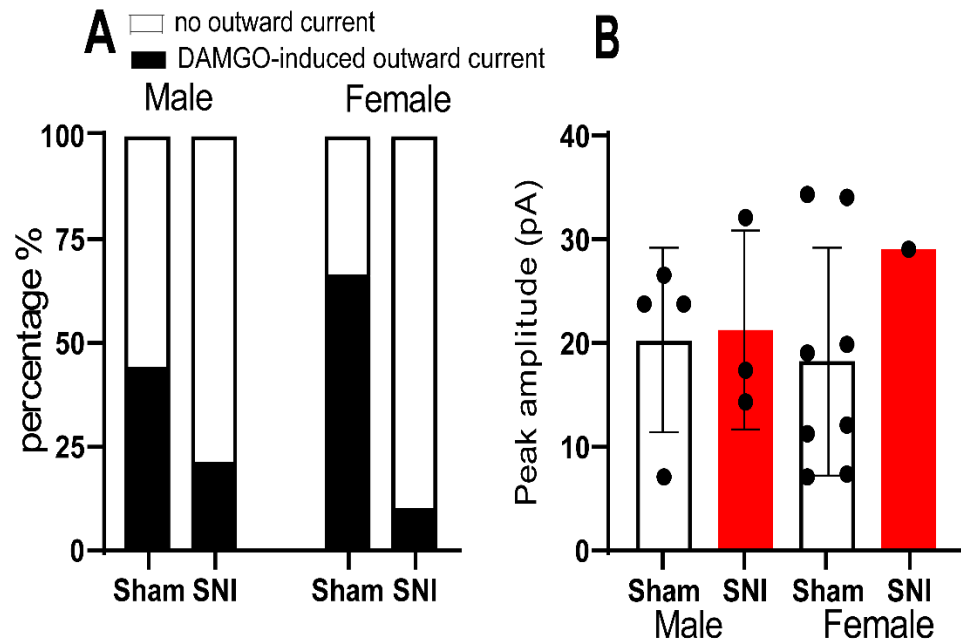

**Supplementary Figure 2. Effects of spared nerve injury on the functional responsiveness of MOR-INs to DAMGO, segregated by sex.** (A) Proportion of  $Oprm1^{tdT}$  neurons exhibiting DAMGO-induced outward currents in sham male (n=9 neurons from 3 mice), SNI male (n=14 neurons from 4 mice), sham female (n=12 neurons from 4 mice), and SNI female (n=10 neurons from 3 mice) groups. (B) Peak amplitude of DAMGO-induced outward currents in sham male (n=4 neurons from 3 mice), SNI male (n=3 neurons from 2 mice), sham female (n=8 neurons from 4 mice), and SNI female (n=1 neurons from 1 mouse) groups. Data are mean  $\pm$  SD. *These panels represent the data illustrated in Figure 5B-C, segregated by sex.*

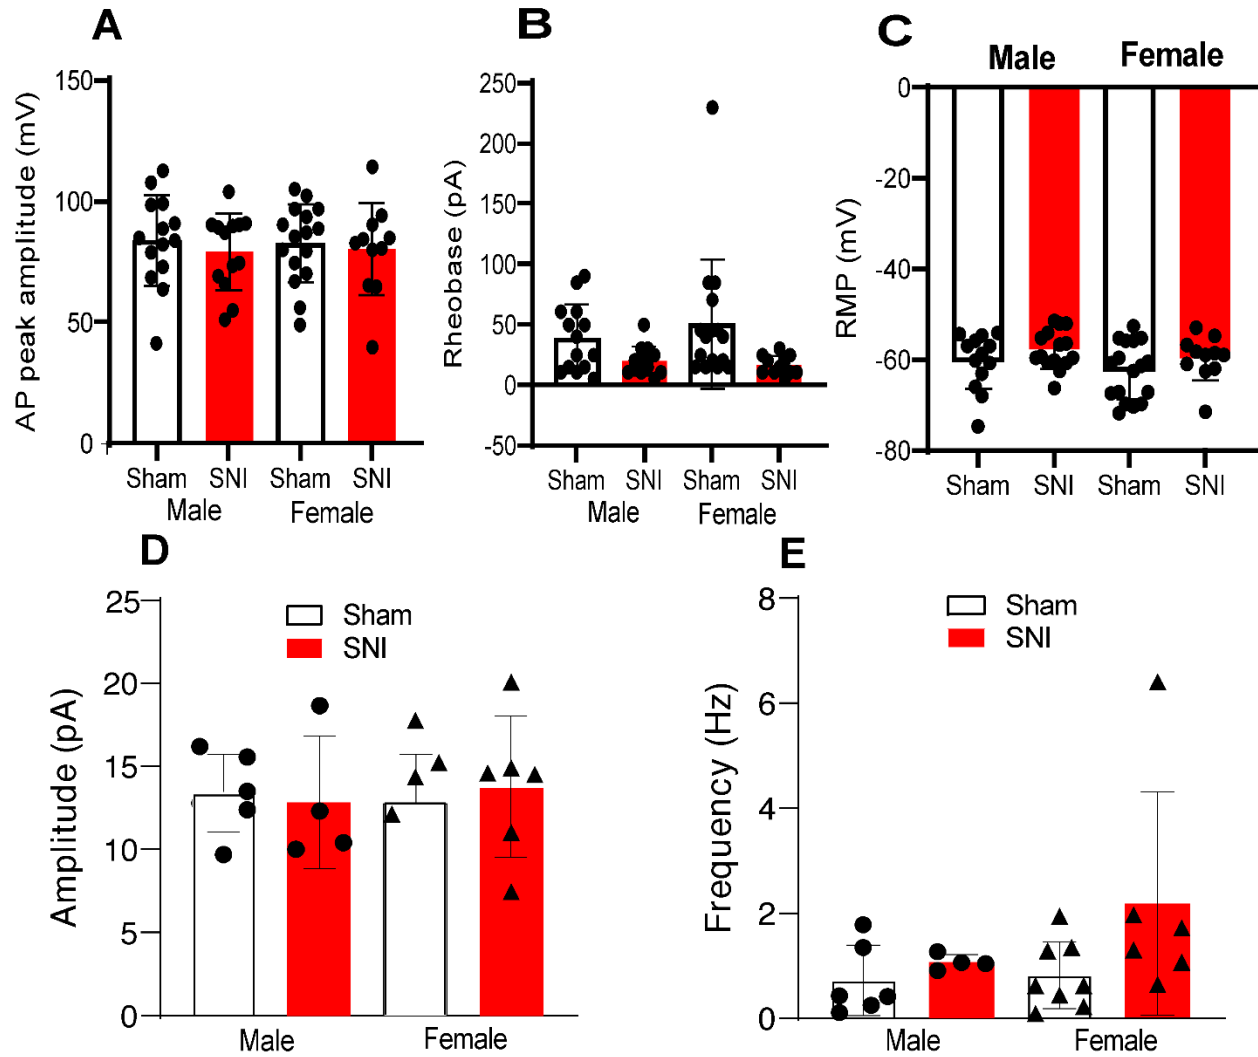

**Supplementary Figure 3. Effect of spared nerve injury on intrinsic membrane excitability and spontaneous synaptic activity of *Oprm1<sup>tdT+</sup>* neurons, segregated by sex.** (A) Peak amplitude of action potentials in sham male (n=14 neurons from 3 mice), SNI male (n=13 neurons from 4 mice), sham female (n=16 neurons from 4 mice), and SNI female (n=11 neurons from 3 mice) groups. (B) Rheobase of action potentials in sham male (n=14 neurons from 3 mice), SNI male (n=13 neurons from 4 mice), sham female (n=16 neurons from 4 mice), and SNI female (n=11 neurons from 3 mice) groups. (C) The resting membrane potential of *Oprm1<sup>tdT+</sup>* neurons in sham male (n=13 neurons from 3 mice), SNI male (n=15 neurons from 4 mice), sham female (n=17 neurons from 4 mice), and SNI female (n=11 neurons from 3 mice) groups. Mean (D) amplitude and (E) frequency of sEPSCs exhibited by delayed firing neuron in sham male (n=6 neurons from 3 mice), SNI male (n=4 neurons from 4 mice), sham female (n=8 neurons from 4 mice), and SNI female (n=6 neurons from 3 mice) groups. Data are mean  $\pm$  SD. *These panels represent the data illustrated in Figure 6A,B,C,F,G, respectively, segregated by sex.*
